1

## Identification of functional long non-coding RNAs in *C. elegans*

2 Alper Akay<sup>1</sup>, David Jordan<sup>1</sup>, Isabela C. Navarro<sup>1</sup>, Tomasz Wrzesinski<sup>3</sup>, Chris P. Ponting<sup>4</sup>, Eric A.  
3 Miska<sup>1,2,\*</sup>, Wilfried Haerty<sup>3,\*</sup>

4

5 <sup>1</sup> Wellcome CRUK Gurdon Institute, University of Cambridge, Tennis Court Road, Cambridge, CB2  
6 1QN, UK and Department of Genetics, University of Cambridge, Downing Street, Cambridge, CB2  
7 3EH, UK

8 <sup>2</sup> Wellcome Sanger Institute, Wellcome Genome Campus, Hinxton, CB10 1SA, UK

9 <sup>3</sup> Earlham Institute, Norwich Research Park, Norwich, UK

10 <sup>4</sup> MRC Human Genetics Unit, Institute of Genetics and Molecular Medicine, University of  
11 Edinburgh, Edinburgh, UK

12 \* Correspondence: [eam29@cam.ac.uk](mailto:eam29@cam.ac.uk) and [Wilfried.Haerty@earlham.ac.uk](mailto:Wilfried.Haerty@earlham.ac.uk)

13

### Abstract

14 **Background:** Functional characterisation of the compact genome of the model organism  
15 *Caenorhabditis elegans* remains incomplete despite its sequencing twenty years ago. The last  
16 decade of research has seen a tremendous increase in the number of non-coding RNAs identified  
17 in various organisms. While we have mechanistic understandings of small non-coding RNA  
18 pathways, long non-coding RNAs represent a diverse class of active transcripts whose function  
19 remains less well characterised.

20 **Results:** By analysing hundreds of published transcriptome datasets, we annotated 3,397 potential  
21 lncRNAs including 146 multi-exonic loci that showed increased nucleotide conservation and GC  
22 content relative to other non-coding regions. Using CRISPR / Cas9 genome editing we generated  
23 deletion mutants for ten long non-coding RNA loci. Using automated microscopy for in-depth  
24 phenotyping, we show that six of the long non-coding RNA loci are required for normal

1 development and fertility. Using RNA interference mediated gene knock-down, we provide  
2 evidence that for two of the long non-coding RNA loci, the observed phenotypes are dependent on  
3 the corresponding RNA transcripts.

4 **Conclusions:** Our results highlight that a large section of the non-coding regions of the *C. elegans*  
5 genome remain unexplored. Based on our in vivo analysis of a selection of high-confidence  
6 lncRNA loci, we expect that a significant proportion of these high-confidence regions is likely to  
7 have biological function at either the genomic or the transcript level.

8

9 Keywords: *C. elegans*, lncRNA, lincRNA, CRISPR, non-coding, long non-coding RNA,

10

## Background

11 Transcription is not limited to the protein-coding regions of eukaryotic genomes, but instead has  
12 been observed to be pervasive in all organisms that have been studied so far. As a consequence  
13 of transcriptional activity over non-coding sections of the genomes, tens of thousands of short,  
14 <200 nucleotide (nt), and long (>200 nt) non-coding RNAs have now been annotated [1,2]. While  
15 much is known about the biological role of most classes of small non-coding RNAs (e.g microRNA,  
16 Piwi-associated RNA, small nucleolar RNA, small interfering RNA) [3–5], relatively little is known  
17 about long non-coding RNAs (lncRNAs). Whether most eukaryotic lncRNAs are functional has long  
18 been debated because of their low expression levels and rapid evolutionary turnover when  
19 compared to protein coding genes [6,7]. However, the molecular activities of more than a hundred  
20 of such loci have now been described [8–12] including many that appear to regulate the expression  
21 of protein-coding genes. Only a small proportion of these loci have been demonstrated to be  
22 fundamental to eukaryote biology from mutations that affect their expression or function leading to  
23 severe developmental defects or to lethal phenotypes (for example, [13,14]). While transcription of  
24 some lncRNAs has been shown to originate at promoter or enhancer elements with potential  
25 DNA-dependent function [15], the activity of others depends on the RNA transcript, acting either in  
26 *cis* or *trans*; e.g targeting protein complexes to chromatin or directly interacting with other RNAs,

1 including mRNAs, lncRNAs, or microRNAs [16]. The proportions of lncRNAs belonging to each  
2 functional class remain unknown owing to painstaking experimental validations, including both  
3 knockout and knockdown assays being required.

4

5 *C. elegans* has been invaluable for the discovery of multiple non-coding RNA pathways and is an  
6 important model organism for genetic studies. Nevertheless, only one study has yet sought to  
7 identify and annotate lncRNAs in *C. elegans*, resulting in 801 annotated loci, of which only 170 had  
8 evidence of polyadenylation [17]. Furthermore, experimental characterisation of *C. elegans*  
9 lncRNAs has been limited [18–20]. Despite evidence confirming their expression [20], previously  
10 identified lncRNAs of *C. elegans* still lack functional validation [17].

11

12 Using publicly available RNA-Seq libraries representing diverse *C. elegans* developmental stages,  
13 we sought to annotate novel expressed long non-coding loci and to characterize informative  
14 features such as nucleotide composition, evolutionary conservation, transcript expression and  
15 functional enrichment. To assess the physiological impact of mutations within these lncRNAs and  
16 thus the biological importance of these loci, we used CRISPR/Cas9 to generate large genomic  
17 deletions for ten lncRNA loci. Six of these intergenic lncRNA loci yielded significant phenotypes  
18 upon deletion, and at least two of these have physiological functions that are RNA-dependent. Our  
19 study and associated experimental validation demonstrate that physiological lncRNA function in  
20 nematodes can be RNA- and/or transcription-dependent. Furthermore, we extrapolate that a  
21 significant proportion of the newly identified multi-exonic non-coding loci in the *C. elegans* genome  
22 might be functional at the genomic or the transcript level.

1

## Results

2

### Long non-coding RNA annotation in *C. elegans*

3 We investigated 209 publicly available RNA-Seq datasets from diverse developmental stages  
4 (Additional File 1) to annotate de novo non-coding transcripts in *C. elegans*. After filtering for size,  
5 coding potential, overlap with existing protein coding genes and loci found in close proximity in the  
6 same orientation to annotated genes (see Methods), we identified 3,397 long (>200 nt) non-coding  
7 RNAs expressed across *C. elegans* development (Additional file 2). Only 197 of these loci were  
8 annotated previously [17].

9

10 In total, 146 multi-exonic and 3,251 mono-exonic loci were identified (18 and 179 of which were  
11 previously known [17]). CAGE data [21] was then used to accurately annotate transcriptional start  
12 sites, and ChIP-Seq [22] and CLIP-Seq [23] data were used to identify transcription factor and  
13 AGO binding sites within the loci (Additional file 3). As observed in all other model organisms, the  
14 identified lncRNA loci are smaller than annotated protein coding genes and are expressed at  
15 significantly lower levels (Additional file 4). lncRNA exons also tend to have a GC content that is  
16 lower than protein coding sequences but higher than intronic sequences (Fig. 1a, b) as observed  
17 previously for other eukaryotes [24]. Inter-species sequence conservation for multi-exonic lncRNAs  
18 was lower than for protein-coding genes but higher than for mono-exonic lncRNAs (Kruskal Wallis  
19 test,  $P=5.73 \times 10^{-5}$ , Fig. 1c). Our newly annotated multi-exonic lncRNAs show sequence features  
20 similar to the final set of 170 lncRNA reported by Nam and Bartel [17], (Kruskal Wallis test,  $P=0.79$   
21 and  $P=0.15$  for nucleotide conservation and composition respectively) showing the  
22 complementarity of these lncRNA annotations.

23

24 Distinct chromatin states inferred from histone modifications using ChromHMM [25] have been  
25 shown to associate with specific genomic elements (for example, transcriptional start sites and

1 promoters, transcriptional elongation and gene bodies, enhancers, transposable element-derived  
2 sequences). Using previously published chromatin annotations in *C. elegans* [26,27], we assessed  
3 the functional enrichment of our newly annotated lncRNA at each of these annotated genomic  
4 elements. Enhancers, identified either by Evans et al. [26] (1.7 fold enrichment  $P<0.0001$ ) or  
5 Daugherty et al. [27] (2.0 fold enrichment,  $P<0.0001$ ), significantly overlapped with these lncRNA  
6 loci but chromatin states associated with transcription elongation (“transcribed gene body”) were  
7 depleted at all developmental stages (Figure 1d, Additional File 5). These results could be  
8 explained by the observed low expression level of the lncRNAs. Our results are in agreement with  
9 Evans et al. [26], who showed that the chromatin states reflecting transcription elongation were  
10 associated with the most highly expressed genes in their study. Active enhancers were particularly  
11 enriched within single exon lncRNAs at all developmental stages (2.0, 2.6 and 2.4 fold enrichment  
12 respectively at the early embryonic, L3, and young adult stages,  $P<0.001$  in all comparisons,  
13 Additional File 5). This result is consistent with enhancer RNAs rarely being spliced [28]. In  
14 contrast, multi-exonic loci were only enriched for active enhancers during early embryonic stage  
15 (2.3 fold enrichment,  $P<0.0001$ ) which likely reflects the fewer number of multi-exonic lncRNA  
16 expressed at later stages.

17

18 Half of all lncRNA loci are expressed in at least 12 libraries (FPKM > 1; or at least 41 libraries if  
19 FPKM>0.1; Fig. 2a). This restricted expression could reflect that many of the newly annotated loci  
20 are the result of transcriptional noise, and therefore likely non-functional [15]. However, many of  
21 the remaining lncRNAs, most specifically multi-exonic lncRNAs, appear to be expressed in a  
22 tissue- and stage-specific manner (Fig. 2b). 26 lncRNAs (10 multi-exonic) were expressed in more  
23 than 90% of the libraries ( $\geq 188$  libraries). Highly reproducible loci ( $\geq 100$  libraries) tended to have a  
24 significantly higher sequence conservation (Kruskal Wallis test, corrected  $P=0.0077$ ) and higher  
25 GC content (Kruskal Wallis test,  $P=3.5\times 10^{-4}$  after Bonferroni correction) compared with loci with  
26 limited reproducibility (<10% libraries) (Fig. 2c, 2d). Highly reproducibly expressed loci also tended

1 to have stronger enrichment for enhancer regions identified in embryos (2.2-3.1 fold enrichment) or  
2 in L3 larvae (2.7-4.4 fold enrichment, Additional File 5).

3

### **Functional characterisation of lncRNA loci**

4 Higher sequence conservation of the 146 multi-exonic lncRNA loci, together with their higher  
5 exonic GC content and their splicing, could reflect organismal function. To test this hypothesis, we  
6 used CRISPR/Cas9 genome editing to generate targeted deletions in 10 of the multi-exonic  
7 lncRNA loci that each showed high sequence conservation, high expression, evidence from  
8 multiple libraries and that are not overlapping with neighbouring coding regions. We were  
9 successful in generating large genomic deletions for ten of these lncRNA loci (Table 1) out of  
10 twenty that were initially targeted. This success rate was due mostly to the limited efficiency of  
11 plasmid based protocols that were available at the time, as compared to direct protein / RNA  
12 injection methods developed later [29]. Of these lncRNA locus deletions, nine removed at least one  
13 exonic region and one removed a region just 5' of a lncRNA locus (Additional file 6).

14

15 All 10 lncRNA deletion mutants initially failed to display overt, gross phenotypes such as sterility,  
16 embryonic lethality or abnormal body development. To undertake a more extensive  
17 characterisation, we captured the development of the mutant animals alongside wild type control  
18 animals using an automated microscopy system. This system records the development of multiple  
19 animals simultaneously, and permits phenotypic analysis in an unbiased manner. Two phenotypes  
20 that can influence the life-history and fitness of populations [30], brood size and growth rate, were  
21 selected for the automated analysis. Six of 10 lncRNA deletion mutants (linc-217, linc-239,  
22 linc-249, linc260, linc-305 and linc-339) yielded significantly reduced brood size (Fig.3a) and 4 of  
23 10 mutants (linc-206, linc-217, linc-239 and linc-249) displayed reduced growth rate (slower body  
24 size increase) over development (Fig.3b). Three mutants (linc-217, linc-239 and linc-249) showed  
25 alterations of both phenotypes (Table 1, Fig. 3).

26

1 These phenotypes could be due to the removal of either the lncRNA transcript or of the genomic  
2 locus which, in some instances, harboured annotated transcription factor binding and enhancer  
3 sites (Additional file 3). To distinguish between these two possibilities, we generated dsRNA  
4 expression vectors for RNAi targeting of the lncRNA transcripts in wild type animals (Table 1).  
5 Using four biological replicates per assay, we targeted 6 lncRNA transcripts using RNAi. We left  
6 out linc-240, linc-328, linc-260 and linc-305 because these were either lacking any phenotype or  
7 yielded only a weak phenotype when deleted.

8

9 Of the four of these six lncRNA loci whose deletion yielded a brood size phenotype, two (linc-239  
10 and linc-339) yielded an equivalent phenotype when expression was reduced using RNAi (Fig. 4a);  
11 for one of these lncRNA loci, linc-239, equivalent reduced growth rate phenotypes were observed  
12 for both its knockout and knock-down (Table 1, Fig. 4b). Direct comparison of the phenotypes  
13 between lncRNA deletion mutants and RNAi knock-down of lncRNAs shows that RNAi knock-down  
14 phenotypes are slightly weaker or equivalent to deletion mutants (Fig. 5a,b). Expression of the two  
15 lncRNAs, linc-239 and linc-339, was validated by RT-PCR (Additional file 7) and we calculated their  
16 expression to be highest during larval development in comparison to embryogenesis (Fig. 5c). This  
17 indicates that, for these two loci, the phenotypes are caused by the disruption of their RNA  
18 transcript-dependent functions. RNAi targeting of another lncRNA, linc-339, also showed a  
19 reduced growth rate, a phenotype that was not observed in the deletion mutant, which could  
20 therefore be a consequence of off-target effects (Fig. 4b). Three additional lncRNA strains (linc-206,  
21 linc-217, linc-249) yielded discordant phenotypes when disrupted or subjected to RNAi (Table 1;  
22 Fig. 4a). This would be consistent with functions of these loci being RNA-independent.

23

## Discussion

24 The identification of functional non-coding elements, including transcribed non-coding sequences,  
25 in genomes has long relied on computational predictions based on sequence conservation [31], or  
26 biochemical activity [32]. However regardless of the preferred approach to predict functional

1 sequences, only experimental validation can truly substantiate the inferred functionality of an  
2 element.

3

4 In our study, we first provide a novel annotation of intergenic lncRNAs in *C. elegans*. This work  
5 expands on the previous annotations delivered by Nam and Bartel [17] as a substantially more  
6 comprehensive RNA-Seq dataset was available at the time of our study (209 vs 35). We also took  
7 advantage of existing resources to further improve the annotations for these loci. These included  
8 not only their expression pattern and nucleotide conservation but also (i) the presence of potential  
9 functional elements within them (transcription factor binding and AGO binding sites), (ii) their  
10 correlation in expression with neighbouring protein coding genes, and (iii) the reported mutant  
11 phenotypes for these genes. The primary aim of these comprehensive annotations was to inform  
12 the selection of candidate lncRNA loci for follow-up experimental validation. Most importantly, we  
13 went beyond computational predictions of functionality as we assessed the in-vivo phenotypic  
14 effect of knocking-out a selection of ten intergenic lncRNAs and implemented knock-down assays  
15 to validate the observed phenotypes and putative transcript mediated function of these loci.

16

### 17 **lncRNAs of *C. elegans***

18 Our newly annotated loci bear all the hallmarks of lncRNAs in other organisms: they tend to be  
19 shorter, expressed at lower levels and have lower degree of conservation than protein coding  
20 sequences [6,7,11]. Furthermore, the GC composition of the multi-exonic lncRNAs in *C. elegans*  
21 does mirror the patterns previously observed in other animals, with increased GC content within  
22 exons relative to introns [24]. These similarities with other animal lncRNA annotations implicate  
23 *C. elegans* as a model organism that is more broadly relevant for investigation of the molecular  
24 functions of lncRNAs and the processes through which those functions are conveyed. Most  
25 importantly the wealth of resources available for *C. elegans* as a model organism, offer the  
26 opportunity to assess the *in vivo* impact of mutations within these loci.

27



1 The observation of enrichment for enhancer sequences within our lncRNA loci emphasises that the  
2 observed function of a locus could be conveyed by discrete functional DNA elements located within  
3 it, rather than by the RNA transcribed at this location. The former would imply that transcription at  
4 this location either reflects or maintains open chromatin states and that the resulting transcript  
5 would likely be biologically inconsequential, whereas the latter would imply RNA  
6 sequence-dependent functionality of the resulting transcript [10,33]. LncRNAs with transcript  
7 mediated function have been shown to act both *in cis* (Xist, [34]) and *in trans* (Paupar, [35]),  
8 whereas those whose function is transcription regulation related are expected to act *in cis*  
9 (transcriptional interference, chromatin modification at enhancers). This duality, transcription-  
10 versus transcript-mediated function, is a recurrent issue when studying lncRNAs, and only the  
11 careful experimental characterisation of each locus through knockdown, and rescue can begin to  
12 deduce the functional mechanism associated with a non-coding transcript [36].

13

#### 14 **Phenotypic characterisation of lncRNAs**

15 Historically, majority of *C. elegans* genes were identified through genetic screens which  
16 concurrently provide phenotypic and functional information. Mutations identified in non-coding  
17 regions of the genome as a result of genetic screens, nevertheless, have largely remained  
18 uncatalogued. With advances in genome editing methods, it is now possible to directly target  
19 non-coding regions for mutational analysis. The lncRNA annotations presented in this study,  
20 together with the detailed documentation of their expression and overlap with existing datasets,  
21 serve as a guide for the targeted analysis of these loci during animal development.

22

23 In *C. elegans*, many small non-coding RNA genes lack discernible phenotypes when deleted  
24 individually [37]. This is mostly due to redundancy between non-coding RNAs and the role such  
25 RNAs play as buffers in gene expression regulation rather than being the master regulators. The  
26 situation may be similar for the majority of lncRNAs, because their roles in the regulation of gene  
27 expression remains incompletely understood and the phenotypic characterisation of many

1 vertebrate lncRNAs has been challenging and has provided sometimes contradictory results [38].  
2 By using automated microscopy, we sought to capture the phenotypes associated with lncRNAs in  
3 an unbiased manner. The observed reductions in brood size and growth rate of lncRNA loci  
4 deletion mutants greatly affect the fitness of these animals, despite their otherwise normal  
5 appearance. For two of the lncRNA loci, linc-239 and linc-339, the phenotypes can be  
6 recapitulated by RNAi knock-down. We thus consider these two lncRNAs as being representative  
7 of bona fide *C. elegans* lncRNAs. However, further experiments will be required to completely rule  
8 out that these lncRNAs are not translated into functional, short polypeptides [39]. The lack of  
9 phenotypes upon RNAi knock-down of the remaining loci could be attributed to the possibility that  
10 observed phenotypes in deletion mutants arising from the removal of DNA-dependent functional  
11 elements. It is also possible that the transcripts of these loci are solely nuclear or expressed in  
12 neuronal tissues, and thus resistant to RNAi in *C. elegans* [40,41].

13

14

15

16

## Conclusions

17 In this study, we increased the current number of potential lncRNAs in *C. elegans* from 801 to  
18 4001. Together with the previously identified high-confidence lncRNA loci, in total 298 loci yield  
19 evidence for possible biological functions because they display higher conservation, higher  
20 expression, higher GC content and splicing. Using genome editing and RNA interference methods,  
21 we tested the functional relevance of ten of these loci and demonstrated that six yield in vivo  
22 phenotypes when deleted. Furthermore, we showed that for at least two out of these six loci the  
23 function is likely conveyed by the RNA transcript. From our in-vivo assays, we estimate by  
24 extrapolation that 40-60% of the multi-exonic lncRNAs identified in this study might have biological  
25 roles. It will be essential to employ sensitive experimental approaches to decipher the fitness effect  
26 of such non-coding loci.

1

2

## Methods

### 3 Intergenic lncRNA identification

4 A total of 209 publicly available libraries were retrieved from the SRA database  
5 (<https://www.ncbi.nlm.nih.gov/sra/>, Additional File 1). Reads were mapped onto the *C. elegans*  
6 (ENSEMBL release 73, WBcel235) reference genome using TOPHAT2 [42]. For each library, de  
7 novo transcripts were called using cufflinks2 [43] and the coding potential of all new intergenic  
8 transcripts was assessed using the Coding Potential Calculator (CPC, [44], score <0). All of the loci  
9 for which every transcript was deemed non-coding, were retained for further analyses as potential  
10 intergenic lncRNAs. All lncRNAs across all libraries were merged into a single annotation file using  
11 cuffcompare. We retained for final analyses only the loci longer than 200 nt, not overlapping any  
12 annotated gene and found at least 50 nucleotides away from annotated genes if located on the  
13 same strand.

14

### 15 Intergenic lncRNA conservation

16 The nucleotide conservation of the candidate loci was assessed using the conservation tracks  
17 (PhyloP) from the UCSC database (<http://hgdownload.soe.ucsc.edu/>). The tracks represent the  
18 nucleotide conservation across 26 nematode species.

19

### 20 Chromatin modifications, transcription binding sites and enhancers associated with 21 lncRNAs

22 In order to facilitate the prioritization of lncRNAs for mutagenesis we parsed publicly available data  
23 to further improve our annotations. We intersected our annotated loci with highly occupied target  
24 regions [45], miRNA binding sites [23], transcription factor binding sites identified by modENCODE  
25 [22], and enhancers identified by Chen et al [21]. We also computed the distance to the closest  
26 protein coding gene as well as the correlation in expression between lncRNAs and their upstream

1 and downstream flanking protein coding genes. Finally, we also reported the known phenotypes for  
2 the proteins flanking lncRNAs. Genomic locations of the respective annotations were transferred to  
3 the ce11 genome assembly using liftOver and files available on the UCSC database. Enrichment  
4 analyses were performed using the Genomic Association Test (GAT) software [46]

5

#### 6 **Identification of transcriptional start sites**

7 We used the 5' end tag sequencing data from Chen et al [21] to identify the putative transcriptional  
8 start sites of the intergenic lncRNAs. We applied the same approach the authors previously applied  
9 to their data. Clusters with at least 2 reads were kept and merged if on the same strand and within  
10 25 nucleotides of each others.

11

#### 12 **CRISPR/Cas9 mediated deletion of lncRNA loci**

13 lncRNA loci were deleted using either plasmid base injection [47,48] or direct protein / RNA  
14 injection methods [29], as previously described. gRNA sequences and the primers used for  
15 screening of the F2 generation animals are given in Additional file 8. Isolated deletion mutants  
16 were backcrossed once to wild type animals. For lncRNA sequences and deletions see Additional  
17 file 9; for genotyping results of deletion mutants see Additional file 10.

18

#### 19 **Cloning of RNAi vectors**

20 Genomic sequences corresponding to the lncRNA loci were amplified using the primers listed in  
21 Additional file 8, cloned using Gibson Assembly [49] into the L4440 vector and transformed into  
22 competent *E. coli* strain HT115 [40].

23

#### 24 **Automated microscopy analysis**

25 **Growth Curves:** Growth curves were estimated using long-term video imaging. In short, a custom  
26 camera system was used to record backlit images of *C. elegans* from the ex-utero egg stage to the  
27 egg laying adult stage (~65 hours). To accomplish this, an imaging system was built, which allowed

1 12 video cameras (Flea3 3.2MP monochrome, Point Grey) to record in parallel. These were used  
2 to record images of 40 *C. elegans* nematodes in 16mm circular arenas continuously at 1Hz for ~3  
3 days. These “mini-wells” were placed in an enclosure where temperature was maintained at  
4  $20C \pm 20 mK$ . The resulting movies were analyzed off-line with a custom written MATLAB script  
5 (Mathworks). Tracking was based on the Hungarian Algorithm for linear assignments, [50–52], and  
6 yielded spatial trajectories  $r(n,t)$  and time series of attributes such as the area of the 2D projection  
7  $A(n,t)$  and the length along the centerline  $l(n,t)$ , where  $n$  denotes the individual and  $t$  denotes  
8 time. Growth curve data were calculated by first taking the time average at time  $s$  in a window of  
9 length  $w$ ,  $A_n(s) = \overline{A(n, s : s + w)}$ . The population average in that window is then the ensemble  
10 average of the individual averages  $A(s) = \langle A_n(s) \rangle$ . For these analysis  $w$  was set at 20 minutes.  
11 Additionally, in each windows, the standard error of the mean was computed. In each set of  
12 experiments, those with mutants, and those done with RNAi bacteria, a standard growth curve was  
13 selected, the *C. elegans* N2 strain, and the *empty vector* (*ev*) bacteria respectively. For visual  
14 clarity, any other growth curves that fell within the 99% confidence interval of the “standard” curve  
15 were combined  $A_J : \langle \{A_j(s) : p(H \neq H_0(A_j, A_{std}) < 0.01)\} \rangle$ . Those that did not fall into this set were  
16 plotted individually (See Additional file 11 for all growth curves plotted individually with  
17 corresponding standard errors).

18

19 **Brood-size:** Brood-size measurements were completed over three 24 hour intervals. First, eggs  
20 were prepared by synchronization via coordinated egg-laying. When these animals had grown to  
21 the L4 stage single animals were transferred to fresh plate (Day 0). For 3 days, each day (Days  
22 1-3) each animal was transferred to a new plate, while the eggs were left on the old plate and  
23 allowed to hatch and grow for ~3 days, after which, the number of animals on each of these plates  
24 was counted [53] using an custom animal counting program utilizing short video recordings.  
25 Animals were agitated by tapping each plate 4 times, after this 15 frames were imaged at 1Hz and  
26 the maximum projection was used as a background image. Animals were then detected by

1 movement using the difference image between each frame and this background image, and  
2 counted this way for 10 additional frames. The final count was returned as the mode of these  
3 counts. This system was tested on plates with fixed numbers of animals and was accurate to within  
4 5%, comparable to human precision. Total brood size was reported then as the sum of the three  
5 days. For mutant strains, this experiment was done for 5 animals of each strain three times. For  
6 the RNAi experiment, this was done for 6 animals for each RNAi clone, also done three separate  
7 times. Data is censored for animals that crawled off of plates.

8

9

## Declarations

10

11 The authors declare that they have no competing interests.

12

13

## Funding

14 This work was supported by Cancer Research UK grant (C13474/A18583, C6946/A14492), the  
15 Wellcome Trust grant (104640/Z/14/Z, 092096/Z/10/Z), and The European Research Council grant  
16 (ERC, grant 260688) awarded to EAM and supported AA and EAM. DJ is supported by a Herchel  
17 Smith post-doctoral fellowship. ICN is supported by Science without Borders Full PhD scholarship  
18 (CNPq, 205589/2014-6). WH and TW are supported by a BBSRC Core Strategic Programme  
19 Grant [BB/P016774/1] and UK Medical Research Council [MR/P026028/1]. CPP is funded by the  
20 UK Medical Research Council. This research was supported in part by the NBI Computing  
21 Infrastructure for Science Group, which provides technical support and maintenance to E's  
22 high-performance computing cluster and storage systems, which enabled us to develop this  
23 workflow.

24

1

## Authors' contributions

2 AA, EAM and WH conceived the project and designed the experiments. TW and WH conducted all  
3 computational data analysis. AA and ICN generated deletion mutants. AA and DJ conducted the  
4 phenotypic analysis. DJ set up the automated microscopy system and conducted microscopy data  
5 analysis. EAM and CPP provided expertise and feedback. AA and WH wrote the manuscript with  
6 input from all authors.

7

## Acknowledgements

8 We thank the Gurdon Institute Media Kitchen for their support in providing reagents and media. We  
9 thank Lalana Songra for spending her student project time on this study.

10

11

12

## Figure legends

13 **Fig.1** LncRNAs sequence features in *C. elegans* **a.** Nucleotide compositions of exons and introns  
14 of lncRNAs and protein coding genes classified according to their gene model. **b.** GC content  
15 variation within non overlapping windows each representing 10% of the sequences across  
16 multiexonic protein-coding and lncRNA loci, the black band represent the GC content of flanking  
17 intergenic sequences. **c.** Nucleotide conservation (Phylo score) comparison among intergenic  
18 sequences, multi- or mono-exonic lncRNAs and protein coding loci. **d.** Enrichment of lncRNAs for  
19 chromatin annotations identified by Daugherty et al [27]. Transcribed gene body: ensemble of  
20 ChromHMM states characterized by H3K79me2, H3K36me3, H3K4me1, and H4K20me1.  
21 Repressed enhancers: ensemble of ChromHMM states characterized by H3K4me1 and  
22 H3K27me3. Low signal: regions without histone modification signals.

23

1 **Fig.2 a.** LncRNA expression properties. **a.** Cumulative distribution of the proportion of multi-exonic,  
2 mono-exonic lncRNA and protein coding loci identified as expressed across all libraries. **b.**  
3 Expression (log<sub>2</sub> RPKM) across *C. elegans* development of 146 multi-exonic lncRNAs. Each  
4 column represents the average expression at one time point for whole individuals in standard  
5 conditions. GC composition (**c**) and nucleotide conservation (**d**) for lncRNA loci depending on the  
6 reproducibility of lncRNA model predictions across libraries. Low: ≤ 20 of the libraries (low), others:  
7 20 to 100 (others), high: ≥ 100 libraries.

8

9 **Fig.3** Phenotyping of 10 lncRNA deletion mutants. **a** Brood sizes are presented with their standard  
10 deviations (blue area) and the 95% confidence interval of the mean (red area). Samples were  
11 compared to wild type animals using a pairwise 2-sample t-test with a multiple test (Bonferroni)  
12 correction. Samples are ordered by increasing p-value and those found to be significant at (p≤0.05)  
13 are shown to the left of the blue line (n=15 animals / mutant). **b** Growth curves were compared to  
14 wild type animals and those found not to be significantly different are shown by their mean across  
15 strains (black line) with the standard error of the mean (grey area). Those found to be significantly  
16 different from the control are shown individually as means only. Inset shows example images of the  
17 wild type (top) and linc-239 mutant (bottom) at 45 hours post hatching with the computer-generated  
18 outlines, and computed area (black line=500µm).

19

20 **Fig.4** RNAi mediated knock-down of lncRNAs. **a** Brood sizes are presented with their standard  
21 deviations (blue area) and the 95% confidence interval of the mean (red area). Samples were  
22 compared to “empty vector” control animals using a pairwise 2-sample t-test with a multiple test  
23 (Bonferroni) correction. Samples are ordered by increasing p-value and those found to be  
24 significant at (p≤0.05) are shown to the left of the blue line (n=18 animals / mutant). Empty vector  
25 (EV), GFP and linc-340 RNAi are negative controls. **b** Growth curves were compared to “empty  
26 vector” animals and those found to be not significantly different are shown by their mean across  
27 strains (black line) with the standard error of the mean (grey area). Those found to be significantly



1 different from the control are shown individually as means only. Inset shows example images of the  
2 “empty vector” (top) and linc-239 RNAi (bottom) at 45 hours post hatching with the  
3 computer-generated outlines, and computed area (black line=500 $\mu$ m).

4

5 **Fig. 5** Comparison of phenotypes arising from lincRNA genomic deletion mutants and phenotypes  
6 arising from RNAi-mediated knock-down of lincRNA transcript. To compare the effects of the  
7 disruption of a lincRNA genomic locus to the knockdown of the corresponding lincRNA transcript by  
8 RNAi, the mean brood size reduction compared to the control (**a**), and the ratio of the length at 50  
9 hours relative to the control (**b**), were plotted. These are shown as a scatter plot of the mean  
10 reduction (**a**, blue circle) or the mean ratio (**b**, blue circle) with the 95% confidence interval of the  
11 mean (orange lines). If the mutations or the RNAi yield an effect, data fall below the line  $y=1$  and to  
12 the left of  $x=1$ . If mutants and RNAi yield similar effects, data fall along the red line; above the red  
13 line indicates that RNAi has a greater effect, while below the red line indicates that the genomic  
14 mutation has a greater effect. **c.** Expression (log<sub>2</sub> RPKM) across *C. elegans* development for  
15 linc-239 and linc-339.

16

1

## References

- 2 1. Derrien T, Johnson R, Bussotti G, Tanzer A, Djebali S, Tilgner H, et al. The GENCODE v7  
3 catalog of human long noncoding RNAs: analysis of their gene structure, evolution, and  
4 expression. *Genome Res.* 2012;22:1775–89.
- 5 2. Young RS, Marques AC, Tibbit C, Haerty W, Bassett AR, Liu J-L, et al. Identification and  
6 properties of 1,119 candidate lincRNA loci in the *Drosophila melanogaster* genome. *Genome Biol*  
7 *Evøl.* 2012;4:427–42.
- 8 3. He L, Hannon GJ. MicroRNAs: small RNAs with a big role in gene regulation. *Nat Rev Genet.*  
9 2004;5:522–31.
- 10 4. Ghildiyal M, Zamore PD. Small silencing RNAs: an expanding universe. *Nat Rev Genet.*  
11 2009;10:94–108.
- 12 5. Liu Q, Paroo Z. Biochemical principles of small RNA pathways. *Annu Rev Biochem.*  
13 2010;79:295–319.
- 14 6. Marques AC, Ponting CP. Catalogues of mammalian long noncoding RNAs: modest  
15 conservation and incompleteness. *Genome Biol.* 2009;10:R124.
- 16 7. Ponjavic J, Ponting CP, Lunter G. Functionality or transcriptional noise? Evidence for selection  
17 within long noncoding RNAs. *Genome Res.* 2007;17:556–65.
- 18 8. Vance KW, Ponting CP. Transcriptional regulatory functions of nuclear long noncoding RNAs.  
19 *Trends Genet.* 2014;30:348–55.
- 20 9. Ponting CP, Oliver PL, Reik W. Evolution and functions of long noncoding RNAs. *Cell.*  
21 2009;136:629–41.
- 22 10. Bassett AR, Akhtar A, Barlow DP, Bird AP, Brockdorff N, Duboule D, et al. Considerations when  
23 investigating lincRNA function in vivo. *Elife.* 2014;3:e03058.
- 24 11. Ulitsky I, Bartel DP. lincRNAs: genomics, evolution, and mechanisms. *Cell.* 2013;154:26–46.
- 25 12. Ulitsky I. Evolution to the rescue: using comparative genomics to understand long non-coding  
26 RNAs. *Nat Rev Genet.* 2016;17:601–14.
- 27 13. Grote P, Wittler L, Hendrix D, Koch F, Währisch S, Beisaw A, et al. The tissue-specific lincRNA  
28 Fendrr is an essential regulator of heart and body wall development in the mouse. *Dev Cell.*  
29 2013;24:206–14.
- 30 14. Marahrens Y, Panning B, Dausman J, Strauss W, Jaenisch R. Xist-deficient mice are defective  
31 in dosage compensation but not spermatogenesis. *Genes Dev.* 1997;11:156–66.
- 32 15. Kopp F, Mendell JT. Functional Classification and Experimental Dissection of Long Noncoding  
33 RNAs. *Cell.* 2018;172:393–407.
- 34 16. Fatica A, Bozzoni I. Long non-coding RNAs: new players in cell differentiation and  
35 development. *Nat Rev Genet.* 2014;15:7–21.
- 36 17. Nam J-W, Bartel DP. Long noncoding RNAs in *C. elegans*. *Genome Res.* 2012;22:2529–40.

- 1 18. Hellwig S, Bass BL. A starvation-induced noncoding RNA modulates expression of  
2Dicer-regulated genes. *Proc Natl Acad Sci U S A*. 2008;105:12897–902.
- 3 19. Essers PB, Nonnekens J, Goos YJ, Betist MC, Viester MD, Mossink B, et al. A Long  
4Noncoding RNA on the Ribosome Is Required for Lifespan Extension. *Cell Rep [Internet]*. 2015;  
Available from: <http://dx.doi.org/10.1016/j.celrep.2014.12.029>
- 6 20. Liu W, Yu E, Chen S, Ma X, Lu Y, Liu X. Spatiotemporal expression profiling of long intervening  
7noncoding RNAs in *Caenorhabditis elegans*. *Sci Rep*. 2017;7:5195.
- 8 21. Chen RA-J, Down TA, Stempor P, Chen QB, Egelhofer TA, Hillier LW, et al. The landscape of  
9RNA polymerase II transcription initiation in *C. elegans* reveals promoter and enhancer  
architectures. *Genome Res*. 2013;23:1339–47.
- 11 22. Gerstein MB, Lu ZJ, Van Nostrand EL, Cheng C, Arshinoff BI, Liu T, et al. Integrative analysis  
12of the *Caenorhabditis elegans* genome by the modENCODE project. *Science*. 2010;330:1775–87.
- 13 23. Grosswendt S, Filipchuk A, Manzano M, Klironomos F, Schilling M, Herzog M, et al.  
14Unambiguous identification of miRNA:target site interactions by different types of ligation reactions.  
*Mol Cell*. 2014;54:1042–54.
- 16 24. Haerty W, Ponting CP. Unexpected selection to retain high GC content and splicing enhancers  
17within exons of multiexonic lncRNA loci. *RNA*. 2015;21:333–46.
- 18 25. Ernst J, Kellis M. ChromHMM: automating chromatin-state discovery and characterization. *Nat*  
19*Methods*. 2012;9:215–6.
- 20 26. Evans KJ, Huang N, Stempor P, Chesney MA, Down TA, Ahringer J. Stable *Caenorhabditis*  
21*elegans* chromatin domains separate broadly expressed and developmentally regulated genes.  
*Proc Natl Acad Sci U S A [Internet]*. 2016; Available from:  
<http://dx.doi.org/10.1073/pnas.1608162113>
- 24 27. Daugherty AC, Yeo RW, Buenrostro JD, Greenleaf WJ, Kundaje A, Brunet A. Chromatin  
25accessibility dynamics reveal novel functional enhancers in *C. elegans*. *Genome Res*.  
2017;27:2096–107.
- 27 28. Li W, Notani D, Rosenfeld MG. Enhancers as non-coding RNA transcription units: recent  
28insights and future perspectives. *Nat Rev Genet*. 2016;17:207–23.
- 29 29. Paix A, Folkmann A, Rasoloson D, Seydoux G. High Efficiency, Homology-Directed Genome  
30Editing in *Caenorhabditis elegans* Using CRISPR-Cas9 Ribonucleoprotein Complexes. *Genetics*.  
2015;201:47–54.
- 32 30. Hodgkin J, Barnes TM. More is not better: brood size and population growth in a self-fertilizing  
33nematode. *Proc Biol Sci*. 1991;246:19–24.
- 34 31. Haerty W, Ponting CP. No gene in the genome makes sense except in the light of evolution.  
35*Annu Rev Genomics Hum Genet*. 2014;15:71–92.
- 36 32. Kellis M, Wold B, Snyder MP, Bernstein BE, Kundaje A, Marinov GK, et al. Defining functional  
37DNA elements in the human genome. *Proc Natl Acad Sci U S A*. 2014;111:6131–8.
- 38 33. Kornienko AE, Guenzl PM, Barlow DP, Pauler FM. Gene regulation by the act of long  
39non-coding RNA transcription. *BMC Biol*. 2013;11:59.
- 40 34. Lee JT, Bartolomei MS. X-inactivation, imprinting, and long noncoding RNAs in health and

- 1 disease. *Cell*. 2013;152:1308–23.
- 2 35. Vance KW, Sansom SN, Lee S, Chalei V, Kong L, Cooper SE, et al. The long non-coding RNA  
3 Paupar regulates the expression of both local and distal genes. *EMBO J*. 2014;33:296–311.
- 4 36. Bassett AR, Akhtar A, Barlow DP, Bird AP, Brockdorff N, Duboule D, et al. Science Forum:  
5 Considerations when investigating lncRNA function in vivo. *Elife*. eLife Sciences Publications  
6 Limited; 2014;3:e03058.
- 7 37. Miska EA, Alvarez-Saavedra E, Abbott AL, Lau NC, Hellman AB, McGonagle SM, et al. Most  
8 *Caenorhabditis elegans* microRNAs are individually not essential for development or viability. *PLoS*  
9 *Genet*. 2007;3:e215.
- 10 38. Goudarzi M, Berg K, Pieper LM, Schier AF. Long non-coding RNAs are largely dispensable for  
11 zebrafish embryogenesis, viability and fertility [Internet]. *bioRxiv*. 2018 [cited 2018 Jul 24]. p.  
12 374702. Available from: <https://www.biorxiv.org/content/early/2018/07/23/374702>
- 13 39. Mackowiak SD, Zauber H, Bielow C, Thiel D, Kutz K, Calviello L, et al. Extensive identification  
14 and analysis of conserved small ORFs in animals. *Genome Biol*.  
15 [genomebiology.biomedcentral.com](http://genomebiology.biomedcentral.com); 2015;16:179.
- 16 40. Timmons L, Court DL, Fire A. Ingestion of bacterially expressed dsRNAs can produce specific  
17 and potent genetic interference in *Caenorhabditis elegans*. *Gene*. Elsevier; 2001;263:103–12.
- 18 41. Guang S, Bochner AF, Pavelec DM, Burkhart KB, Harding S, Lachowiec J, et al. An Argonaute  
19 transports siRNAs from the cytoplasm to the nucleus. *Science*. AAAS; 2008;321:537–41.
- 20 42. Kim D, Pertea G, Trapnell C, Pimentel H, Kelley R, Salzberg SL. TopHat2: accurate alignment  
21 of transcriptomes in the presence of insertions, deletions and gene fusions. *Genome Biol*.  
22 2013;14:R36.
- 23 43. Trapnell C, Hendrickson DG, Sauvageau M, Goff L, Rinn JL, Pachter L. Differential analysis of  
24 gene regulation at transcript resolution with RNA-seq. *Nat Biotechnol*. 2013;31:46–53.
- 25 44. Kong L, Zhang Y, Ye Z-Q, Liu X-Q, Zhao S-Q, Wei L, et al. CPC: assess the protein-coding  
26 potential of transcripts using sequence features and support vector machine. *Nucleic Acids Res*.  
27 2007;35:W345–9.
- 28 45. Chen RA-J, Stempor P, Down TA, Zeiser E, Feuer SK, Ahringer J. Extreme HOT regions are  
29 CpG-dense promoters in *C. elegans* and humans. *Genome Res*. 2014;24:1138–46.
- 30 46. Heger A, Webber C, Goodson M, Ponting CP, Lunter G. GAT: a simulation framework for  
31 testing the association of genomic intervals. *Bioinformatics*. 2013;29:2046–8.
- 32 47. Friedland AE, Tzur YB, Esvelt KM, Colaiácovo MP, Church GM, Calarco JA. Heritable genome  
33 editing in *C. elegans* via a CRISPR-Cas9 system. *Nat Methods*. 2013;10:741–3.
- 34 48. Arribere JA, Bell RT, Fu BXH, Artiles KL, Hartman PS, Fire AZ. Efficient marker-free recovery  
35 of custom genetic modifications with CRISPR/Cas9 in *Caenorhabditis elegans*. *Genetics*.  
36 2014;198:837–46.
- 37 49. Gibson DG, Young L, Chuang R-Y, Venter JC, Hutchison CA 3rd, Smith HO. Enzymatic  
38 assembly of DNA molecules up to several hundred kilobases. *Nat Methods*. [nature.com](http://nature.com);  
39 2009;6:343–5.
- 40 50. Kuhn HW. The Hungarian method for the assignment problem. *Nav Res Logist*. 1955;2:83–97.

- 1 51. Jaqaman K, Loerke D, Mettlen M, Kuwata H, Grinstein S, Schmid SL, et al. Robust  
2 single-particle tracking in live-cell time-lapse sequences. *Nat Methods*. 2008;5:695–702.
- 3 52. Jordan D, Kuehn S, Katifori E, Leibler S. Behavioral diversity in microbes and low-dimensional  
4 phenotypic spaces. *Proc Natl Acad Sci U S A*. 2013;110:14018–23.
- 5 53. Hodgkin J, Barnes TM. More is not better: brood size and population growth in a self-fertilizing  
6 nematode. *Proc R Soc Lond B Biol Sci*. 1991;246:19–24.
- 7
- 8
- 9

1 **Additional files**

2

3 **Additional file 1:** List of the RNA-Seq libraries used to annotate lncRNAs.

4

5 **Additional file 2:** Annotation of the novel lncRNAs in *C. elegans*. (GTF file)

6

7 **Additional file 3:** Characterization of the nucleotide sequence properties (location, composition,  
8 nucleotide conservation, functional elements) and expression of lncRNAs in *C. elegans*.

9

10 **Additional file 4:** Comparison of protein coding and lncRNA transcript size. (PDF file)

11

12 **Additional file 5:** Enrichment of lncRNAs. (PDF file)

13

14 **Additional file 6:** Gene structure of 10 lncRNAs and their neighbouring genes. (PDF file)

15

16 **Additional file 7:** RT-PCR of 2 lncRNAs. (PDF file)

17

18 **Additional file 8:** Primers and gRNAs used in this study. (XLSX file)

19

20 **Additional file 9:** Sequence of 10 lncRNAs and deletions. (TXT file)

21

22 **Additional file 10:** Genotyping of 10 lncRNA mutants (PDF file)

23

24 **Additional file 11:** Extended methods for automated microscopy and phenotyping. (PDF file)

25

26

27

**Table 1. List of lincRNAs and their associated phenotypes**

| Strain | lincRNA  | Locus       | Chr | RNAi clone # | Reduced brood size (deletion mutant) | Smaller body size (deletion mutant) | Reduced brood size (RNAi) | Smaller body size (RNAi) |
|--------|----------|-------------|-----|--------------|--------------------------------------|-------------------------------------|---------------------------|--------------------------|
| SX3268 | linc-206 | XLOC_000670 | I   | 112          | -                                    | +                                   | -                         | -                        |
| SX3278 | linc-217 | XLOC_003573 | I   | 111          | +                                    | +                                   | -                         | -                        |
| SX3269 | linc-239 | XLOC_005681 | II  | 106          | +                                    | +                                   | +                         | +                        |
| SX3332 | linc-240 | XLOC_008459 | II  |              | -                                    | -                                   |                           |                          |
| SX3340 | linc-249 | XLOC_009275 | II  | 108          | +                                    | +                                   | -                         | -                        |
| SX3270 | linc-260 | XLOC_010885 | III |              | +                                    | -                                   |                           |                          |
| SX3313 | linc-305 | XLOC_040158 | X   |              | +                                    | -                                   |                           |                          |
| SX3338 | linc-328 | XLOC_041869 | X   |              | -                                    | -                                   |                           |                          |
| SX3315 | linc-339 | XLOC_045957 | X   | 107          | +                                    | -                                   | +                         | +                        |
| SX3271 | linc-340 | XLOC_047005 | X   | 109          | -                                    | -                                   | -                         | -                        |

## Figure 1

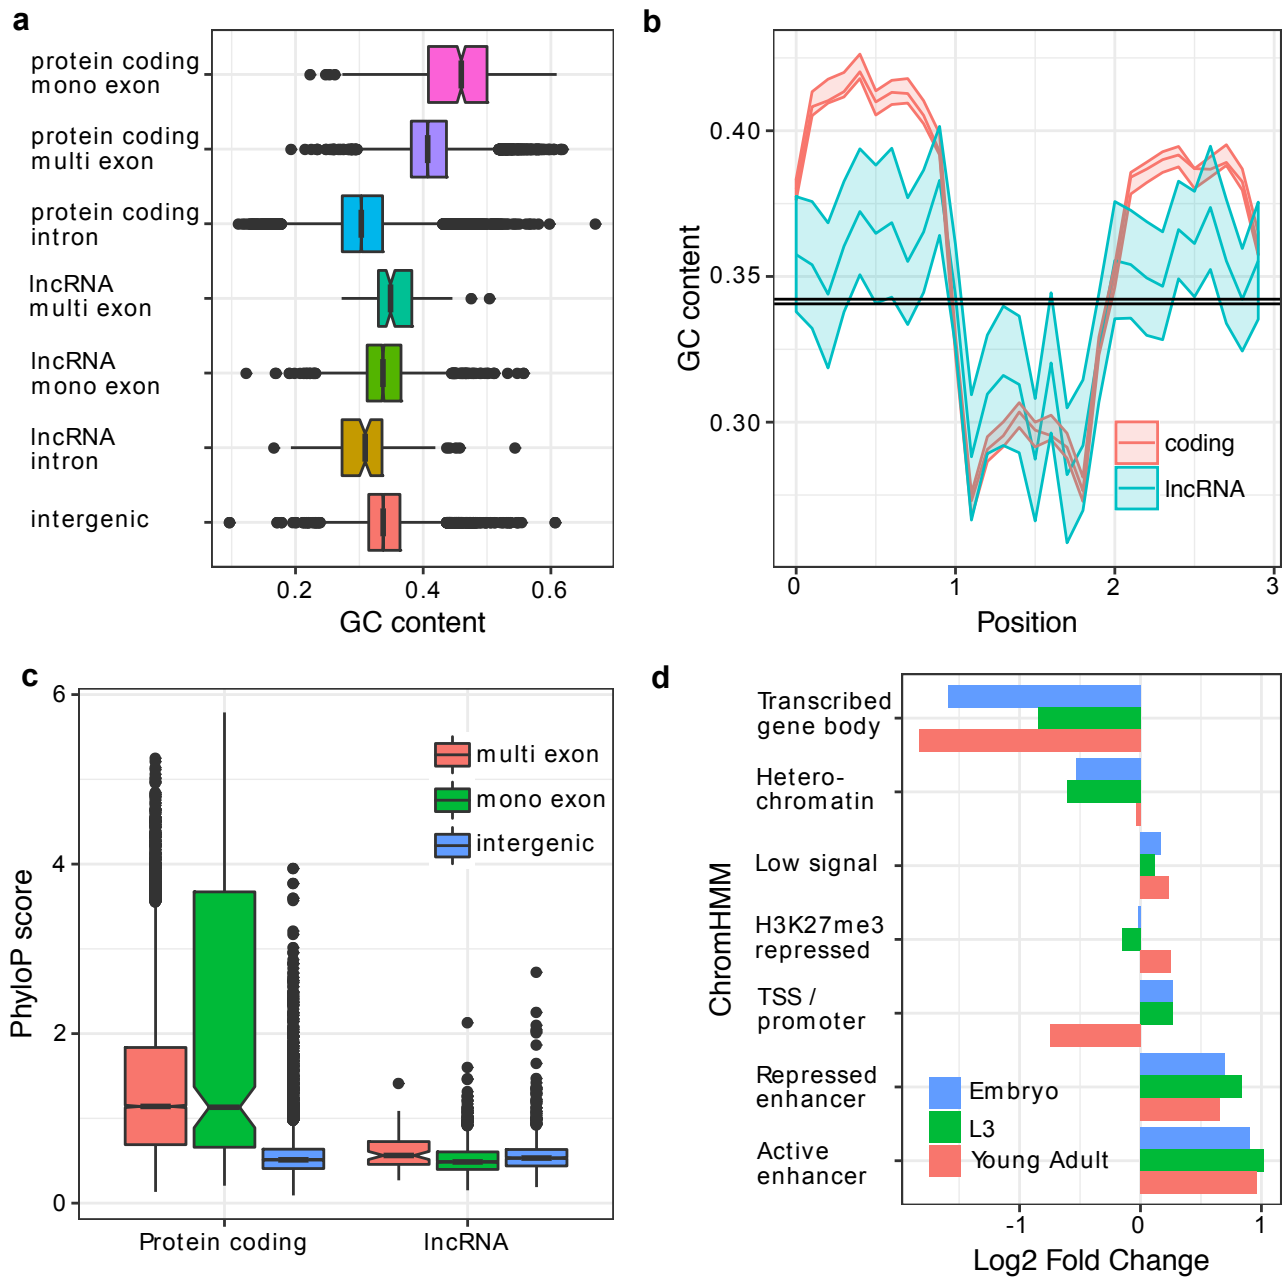



## Figure 2

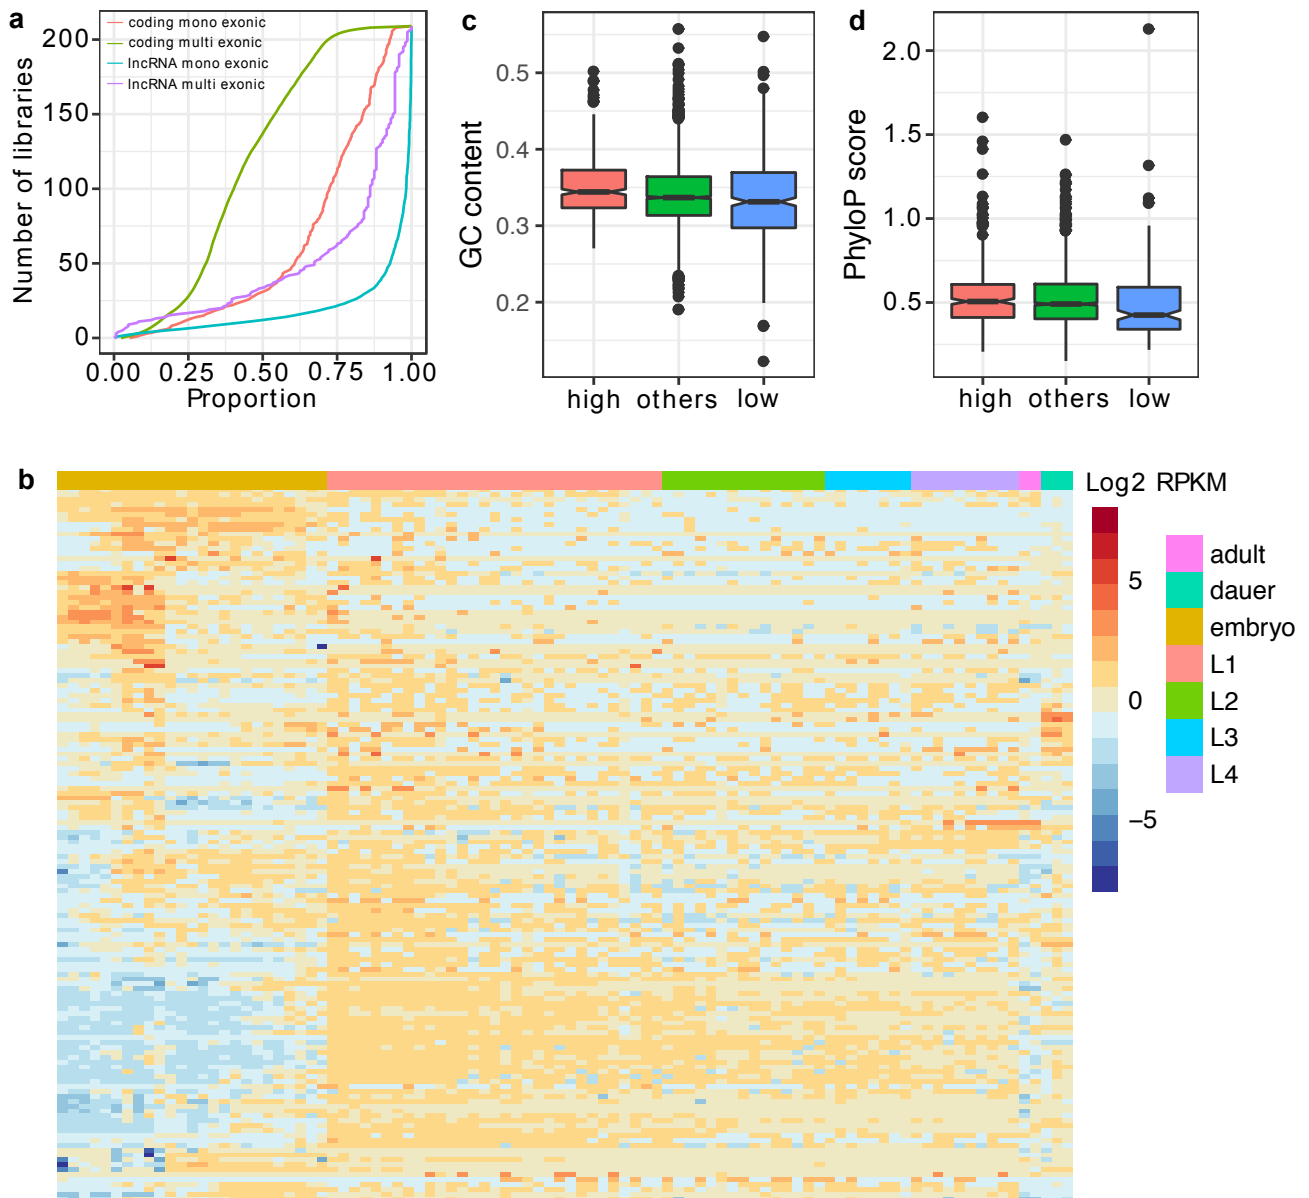

## Figure 3

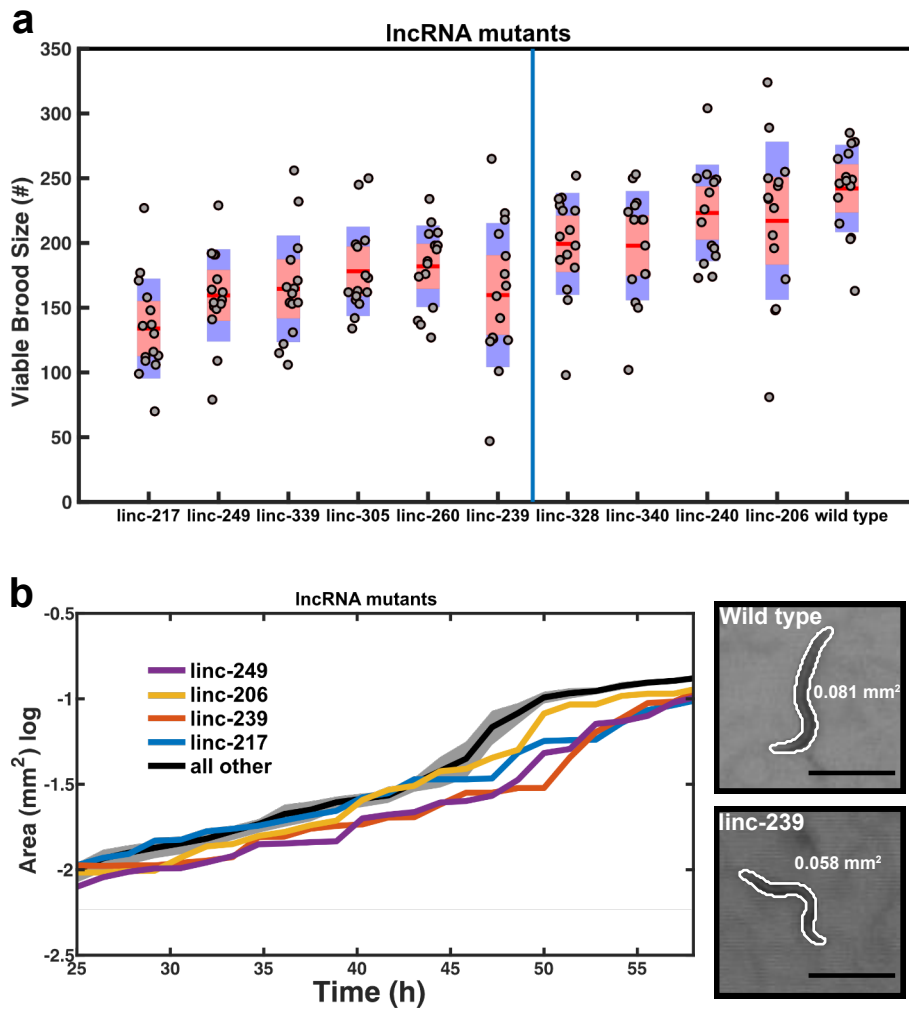

## Figure 4

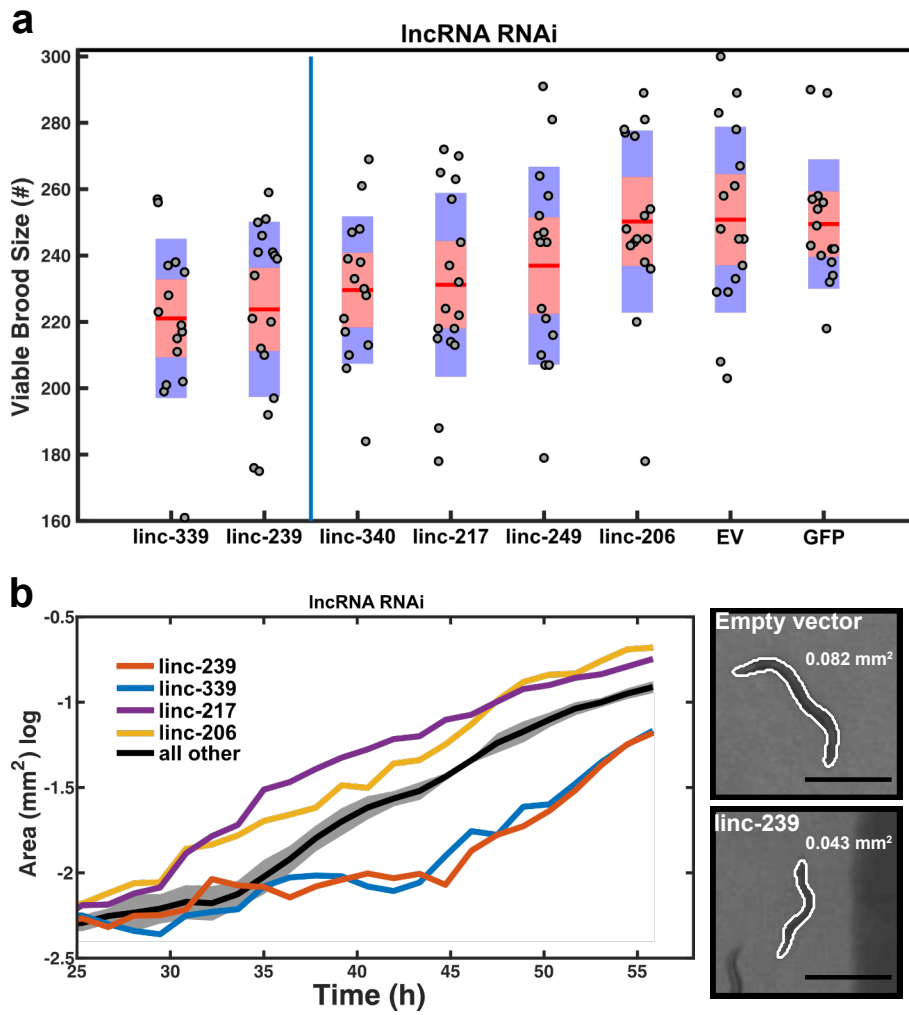

## Figure 5

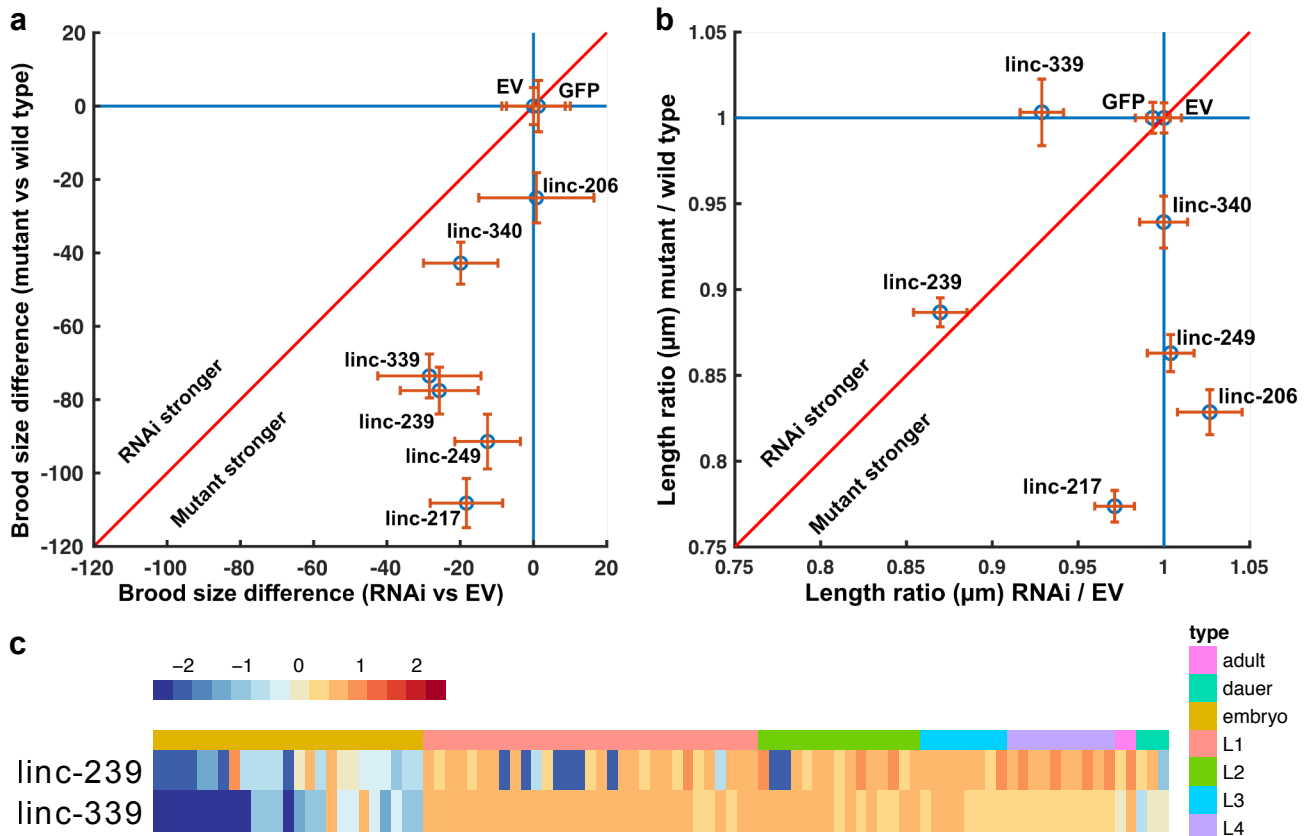

Source: https://www.biorxiv.org/content/10.1101/383919v1.full.pdf
